# Supplementary material for: A systematic dissection of the epigenomic heterogeneity of lung adenocarcinoma reveals two different subclasses with distinct prognosis and core regulatory networks
Source: PubMed Central journal article supplement (PMC8127276; doi:10.1186/s13059-021-02376-1), 2021-05-17
Supplement: 13059_2021_2376_MOESM1_ESM.pdf [file 13059_2021_2376_MOESM1_ESM.pdf]

**Fig. S1****A**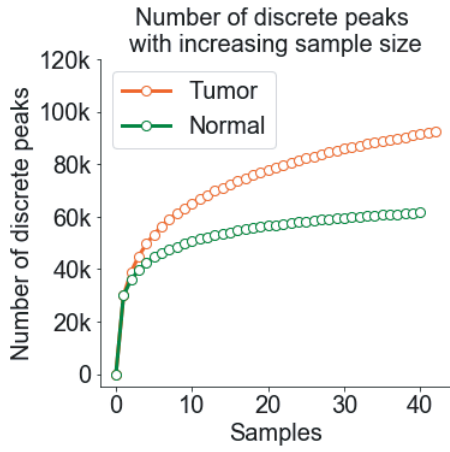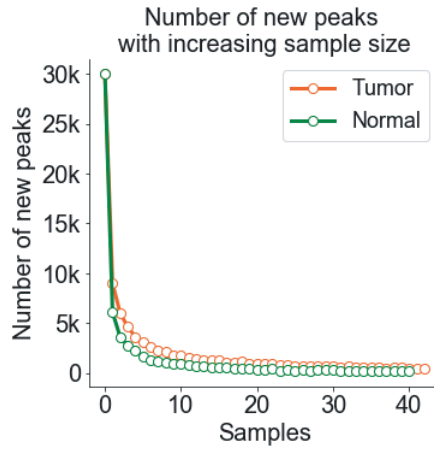**B**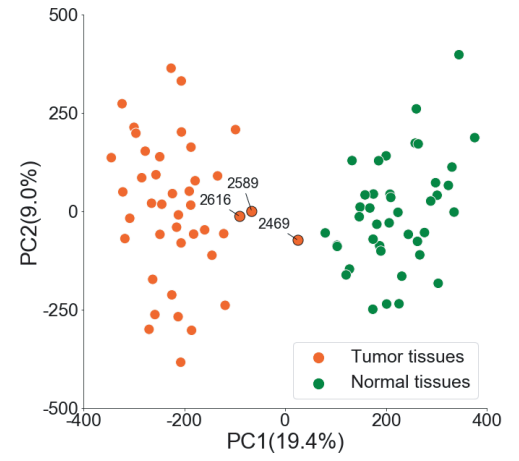**C**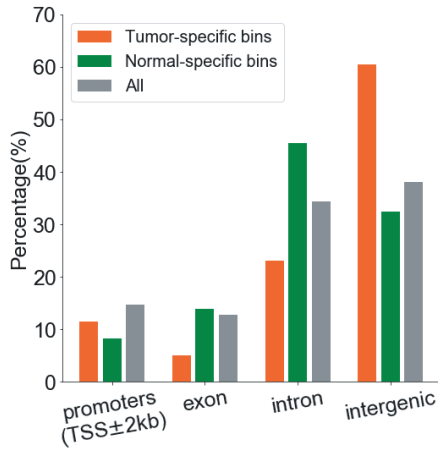**D**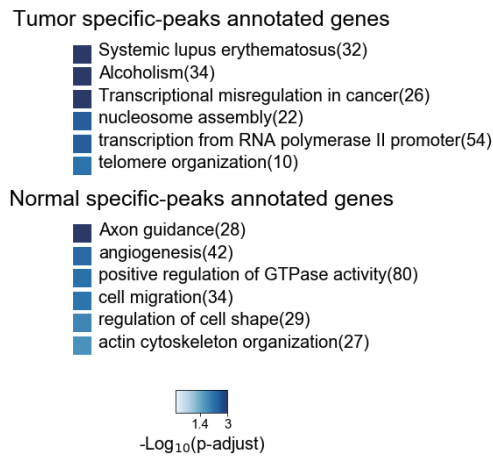**E**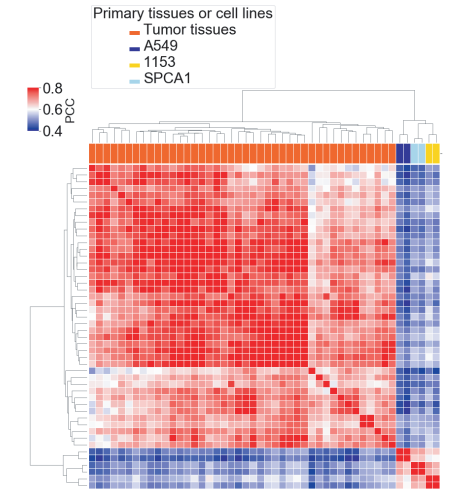**F**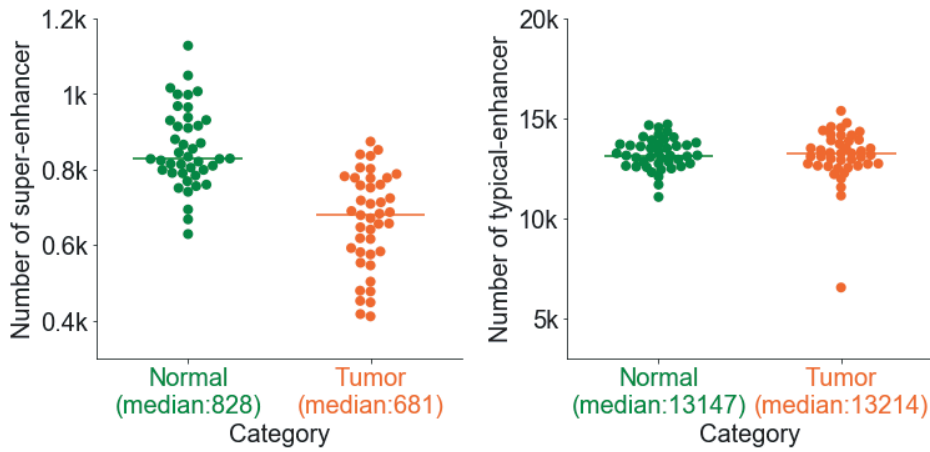**G**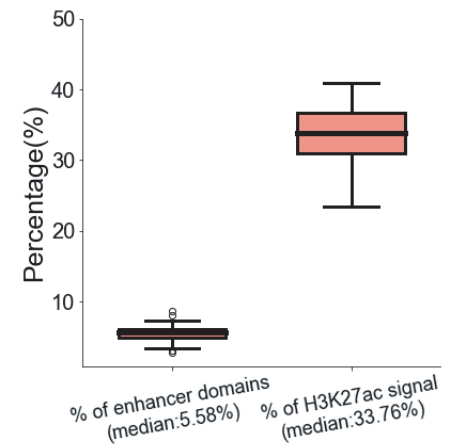

**Fig. S2**

**A**

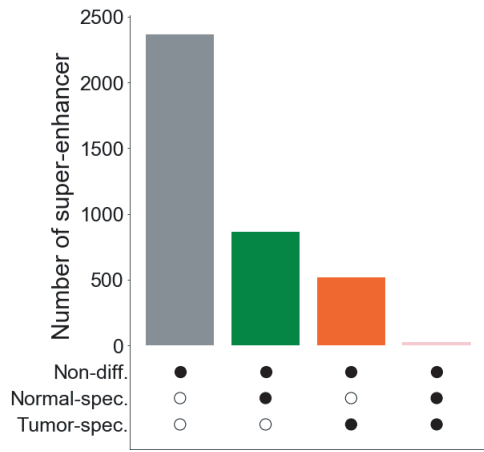

**B**

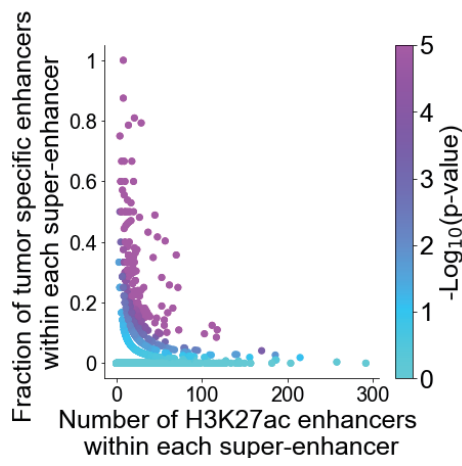

**C**

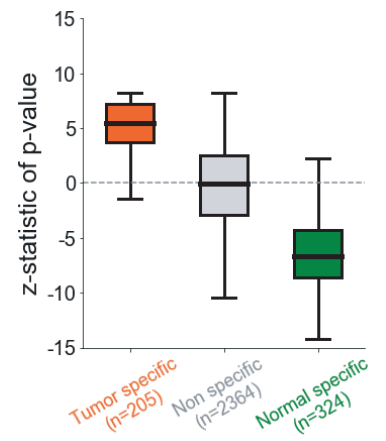

**D**

|                               | super-enhancer  | typical-enhancer | sum            |
|-------------------------------|-----------------|------------------|----------------|
| <b>differential sites</b>     | <b>5,814</b>    | <b>5,760</b>     | <b>11,574</b>  |
| <b>non-differential sites</b> | <b>90,906</b>   | <b>138,734</b>   | <b>229,640</b> |
| <b>Odd-ratio</b>              | <b>1.54</b>     |                  |                |
| <b>p-value</b>                | <b>7.2E-113</b> |                  |                |

**Fig. S3****A**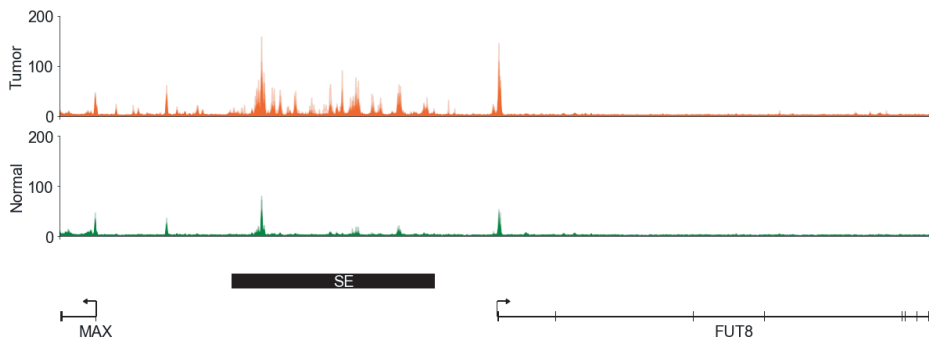**B**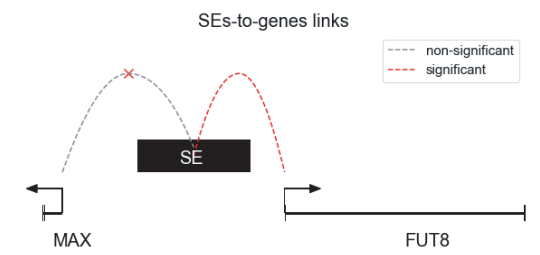**C**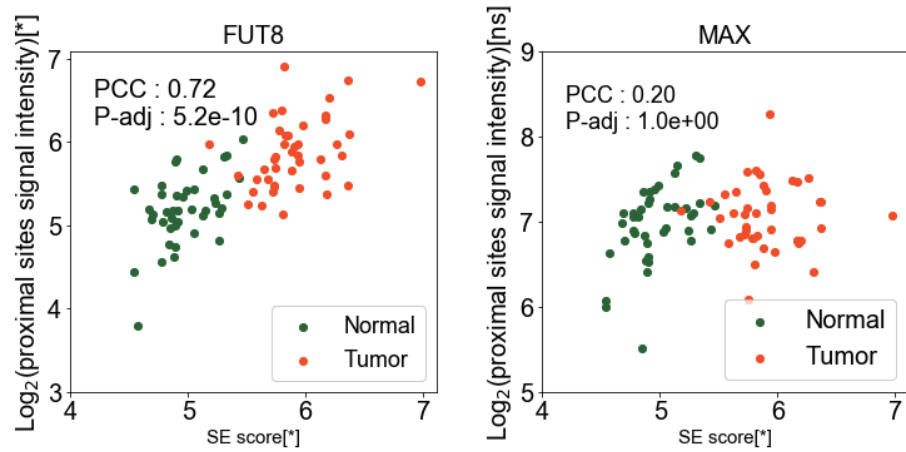**D**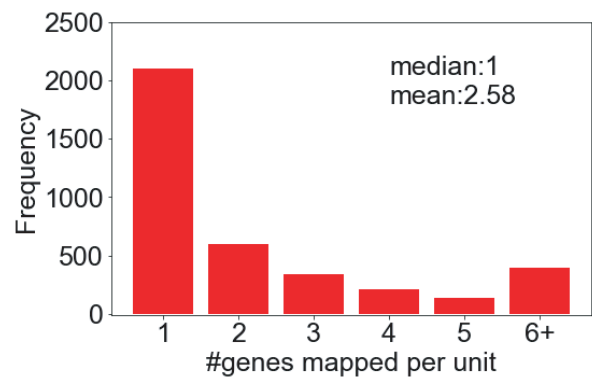**E**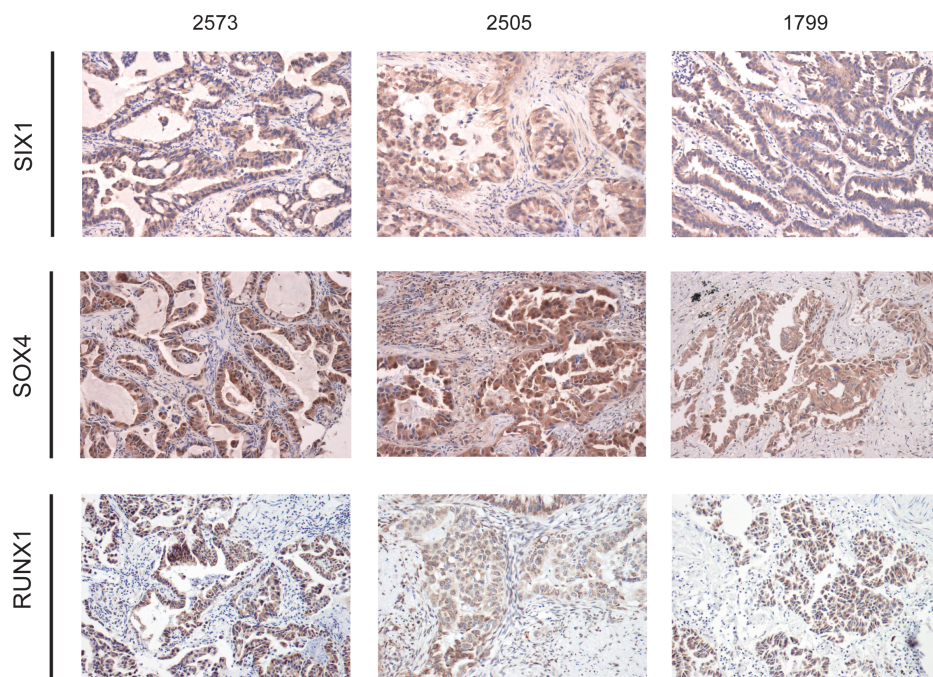**F**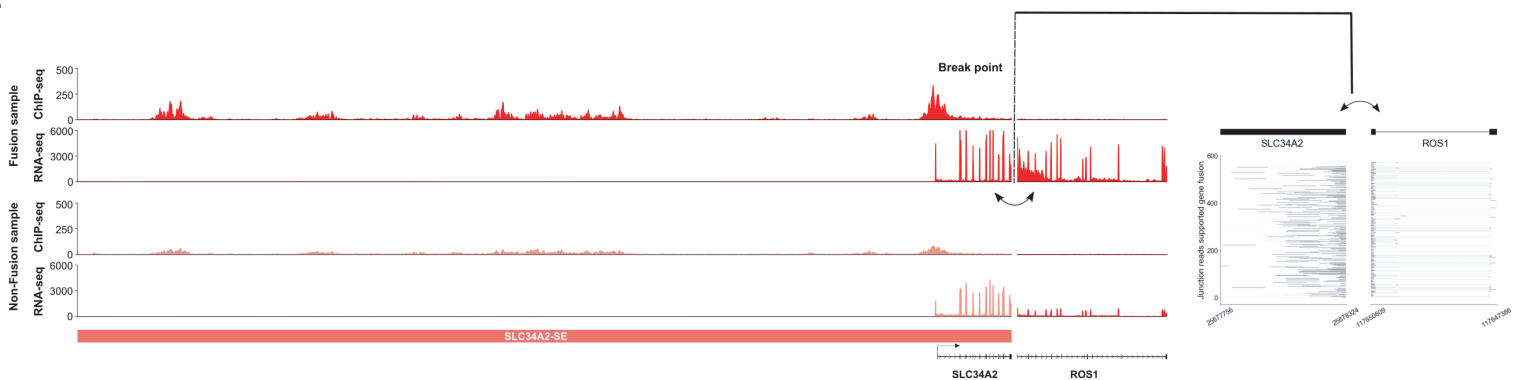

**Fig. S4**

**A**

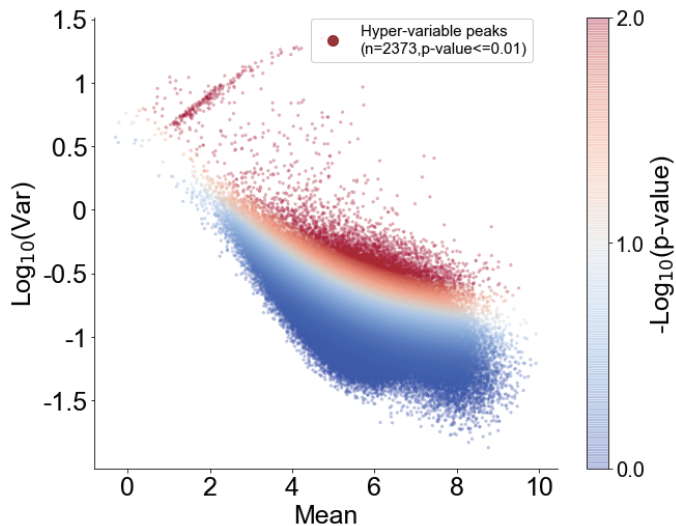

**B**

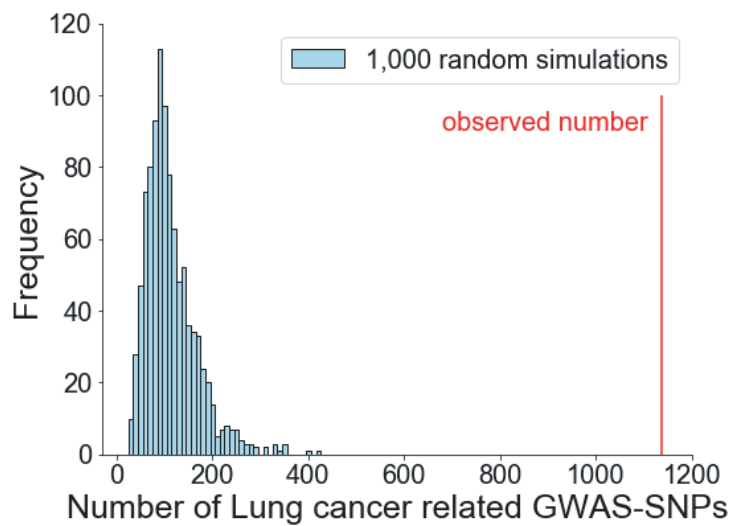

**C**

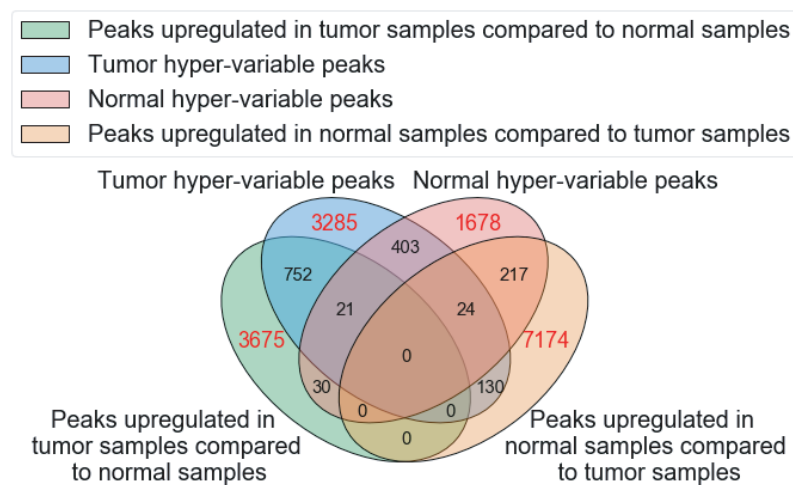

**D**

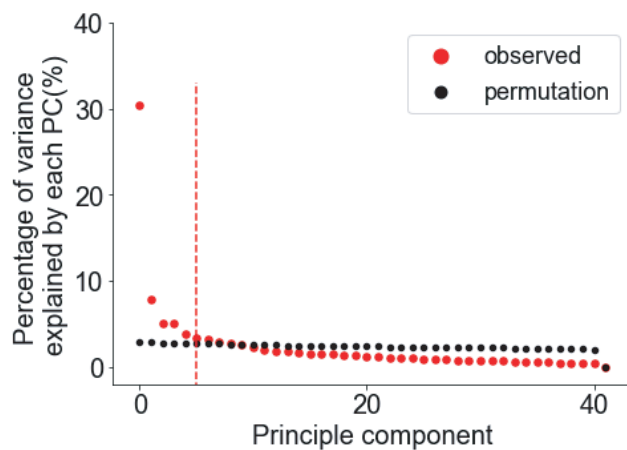

**E**

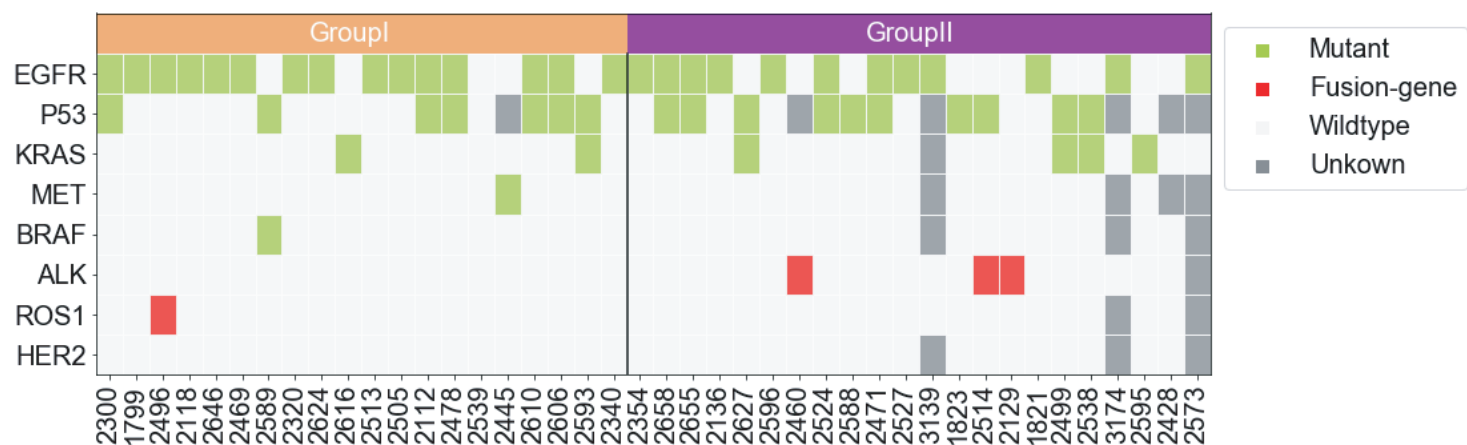



Fig. S5

A

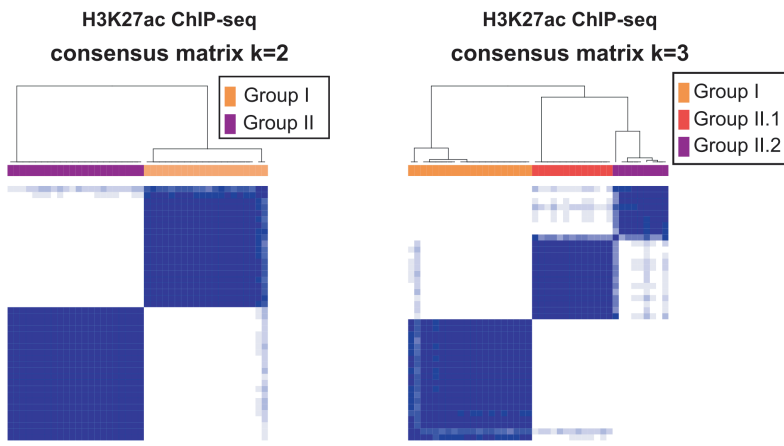

B

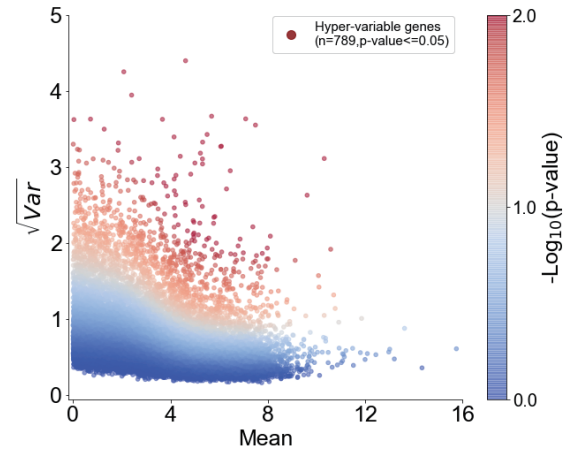

C

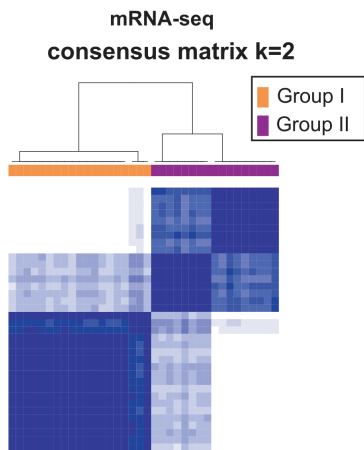

D

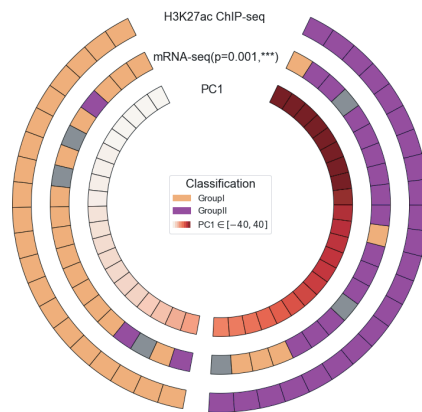

E

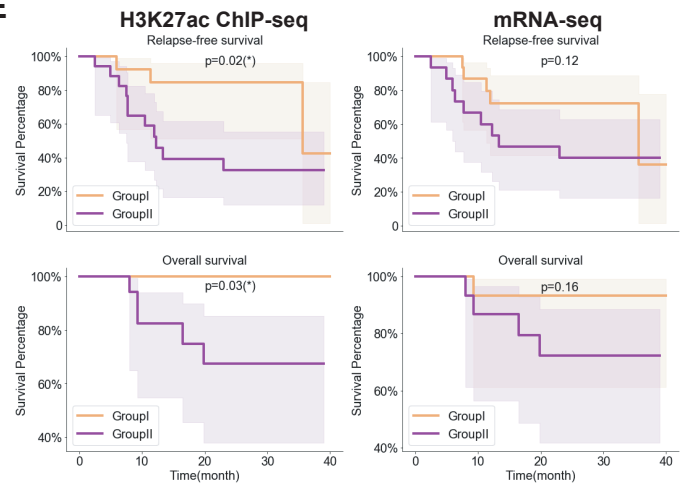

Fig. S6

A

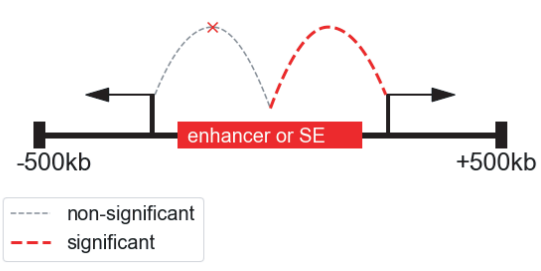

B

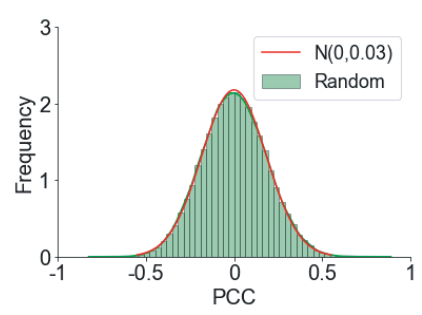

C

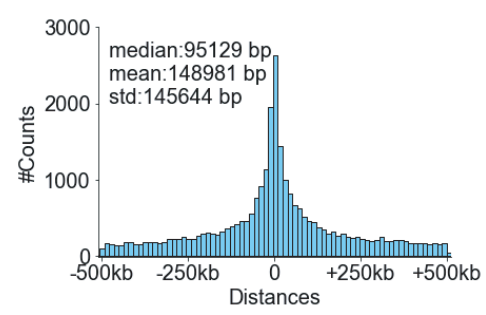

D

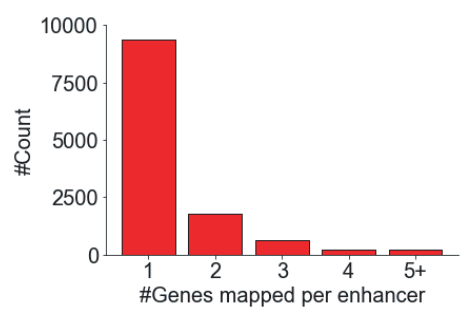

E

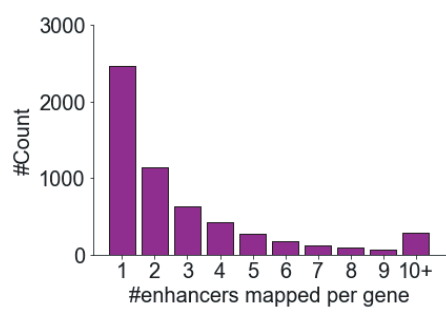

F

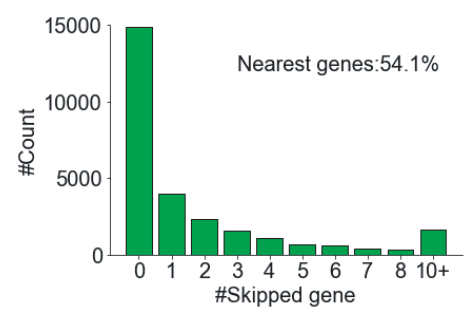

**Fig. S7**

**A**

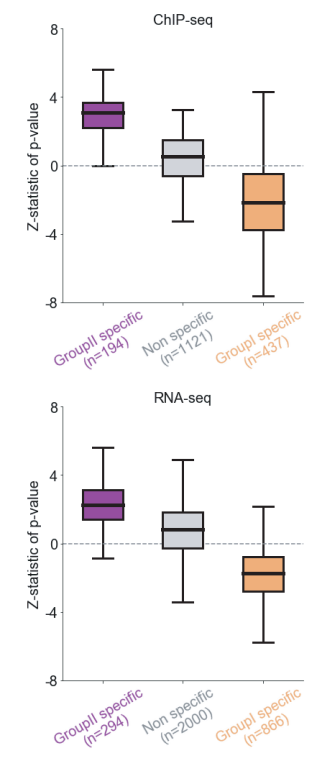

**B**

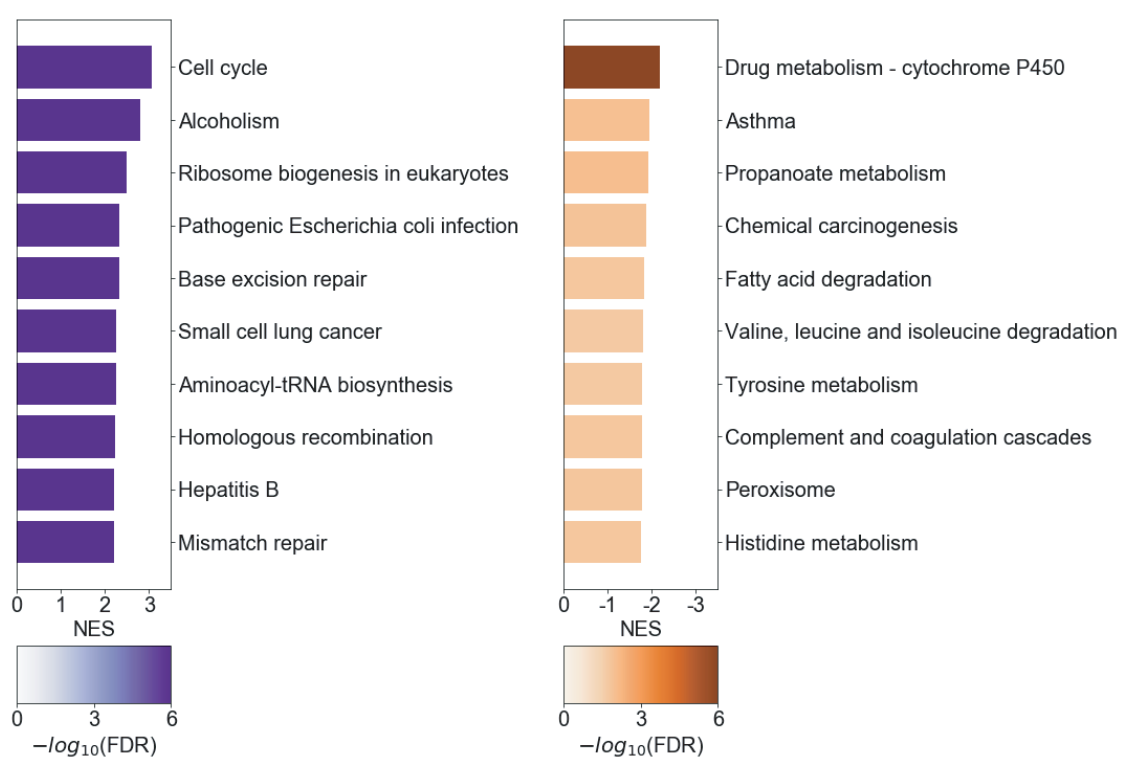

**C**

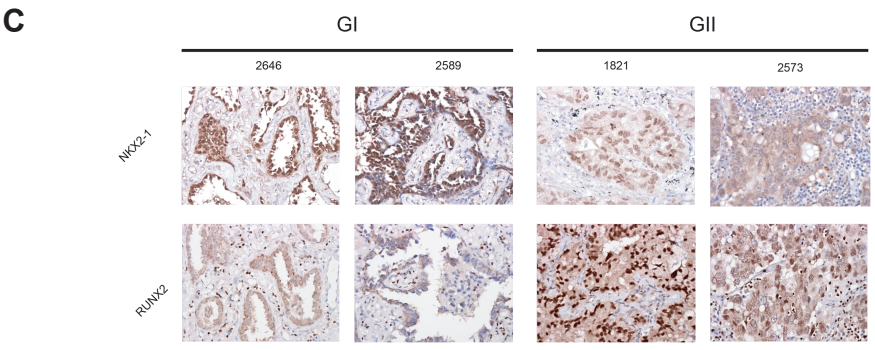

**D**

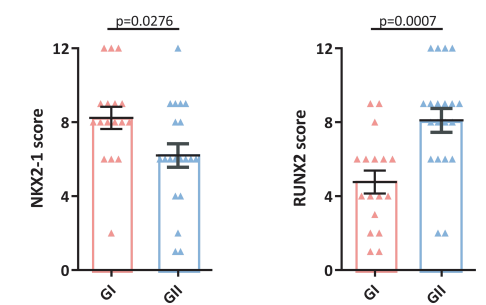

**E**

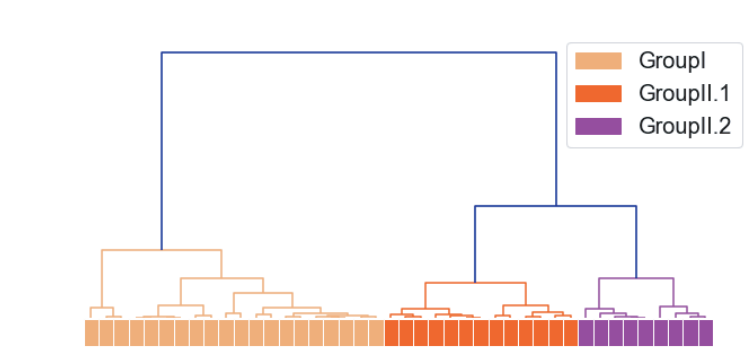

**F**

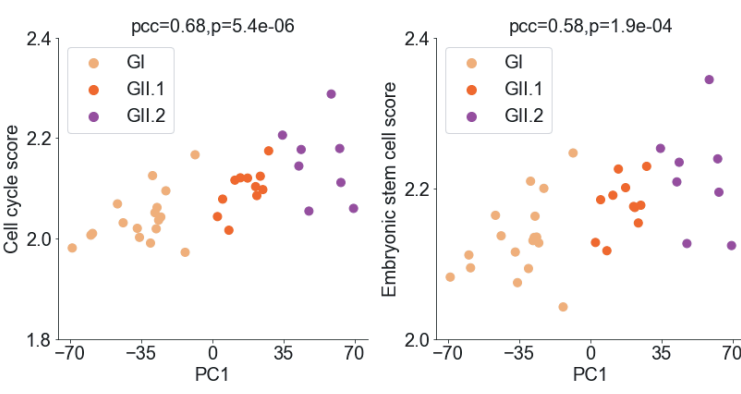

**G**

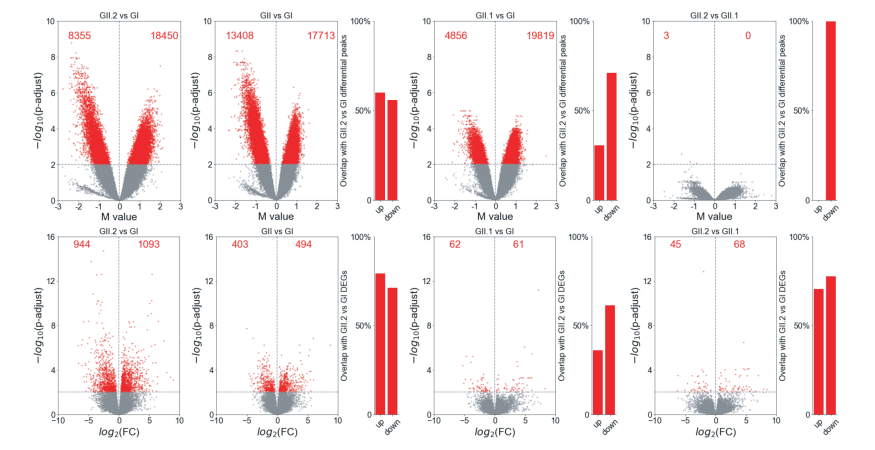

**Fig. S8**

**A**

Heatmap of Cell cycle genes expression

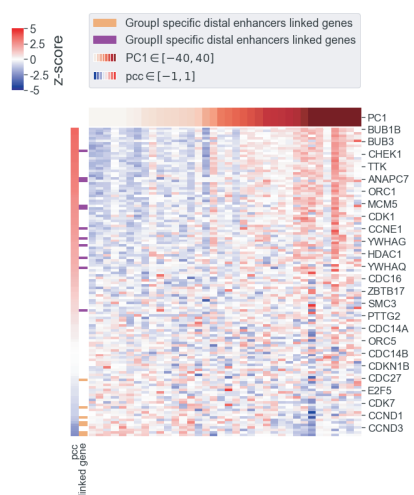

**B**

SHEDDEN\_LUNG\_CANCER\_GOOD\_SURVIVAL\_A4

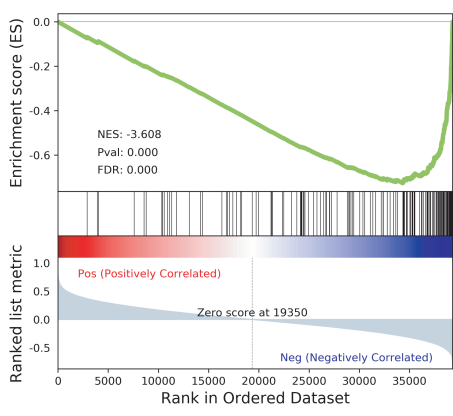

SHEDDEN\_LUNG\_CANCER\_POOR\_SURVIVAL\_A6

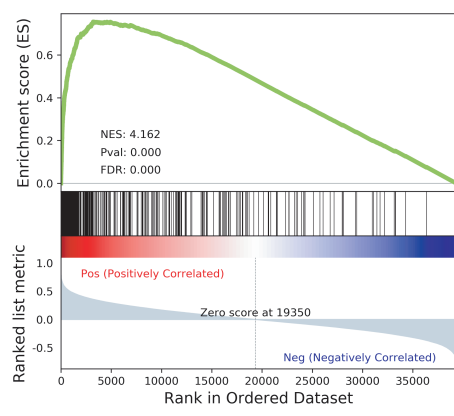

**C**

WONG\_EMBRYONIC\_STEM\_CELL\_CORE

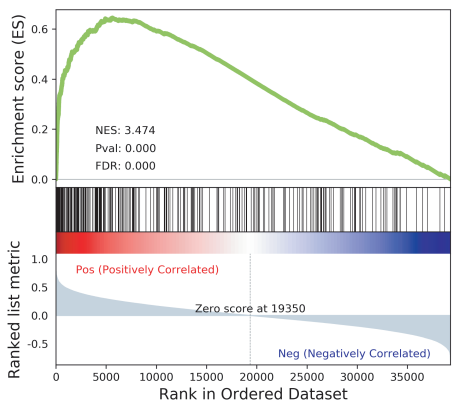

SCIAN\_CELL\_CYCLE\_TARGETS\_OF\_TP53\_AND\_TP73\_DN

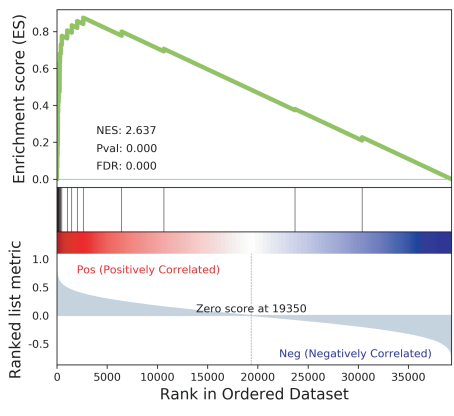

KAMMINGA\_EZH2\_TARGETS

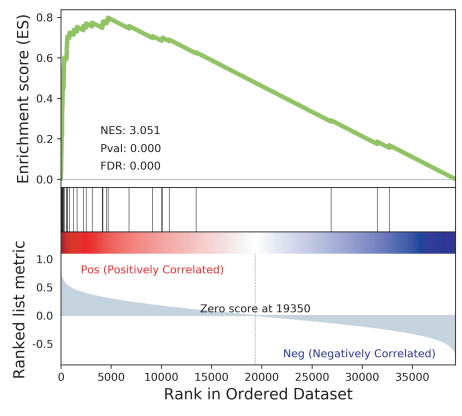

**D**

KEGG\_ASTHMA

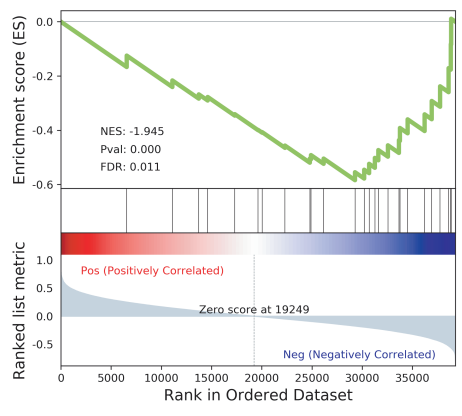

SHEDDEN\_LUNG\_CANCER\_GOOD\_SURVIVAL\_A4

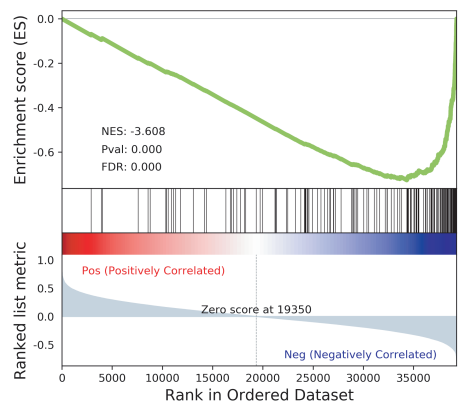

Complement and coagulation cascades\_Homo sapiens\_hsa04610

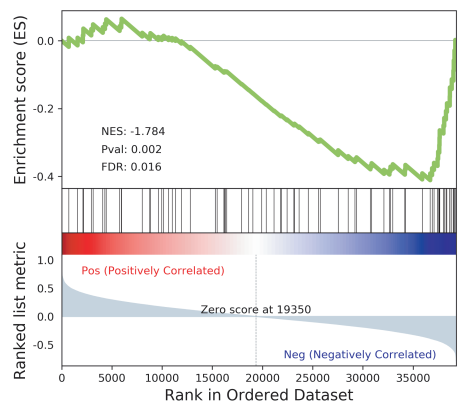

**Fig. S9**

**A**

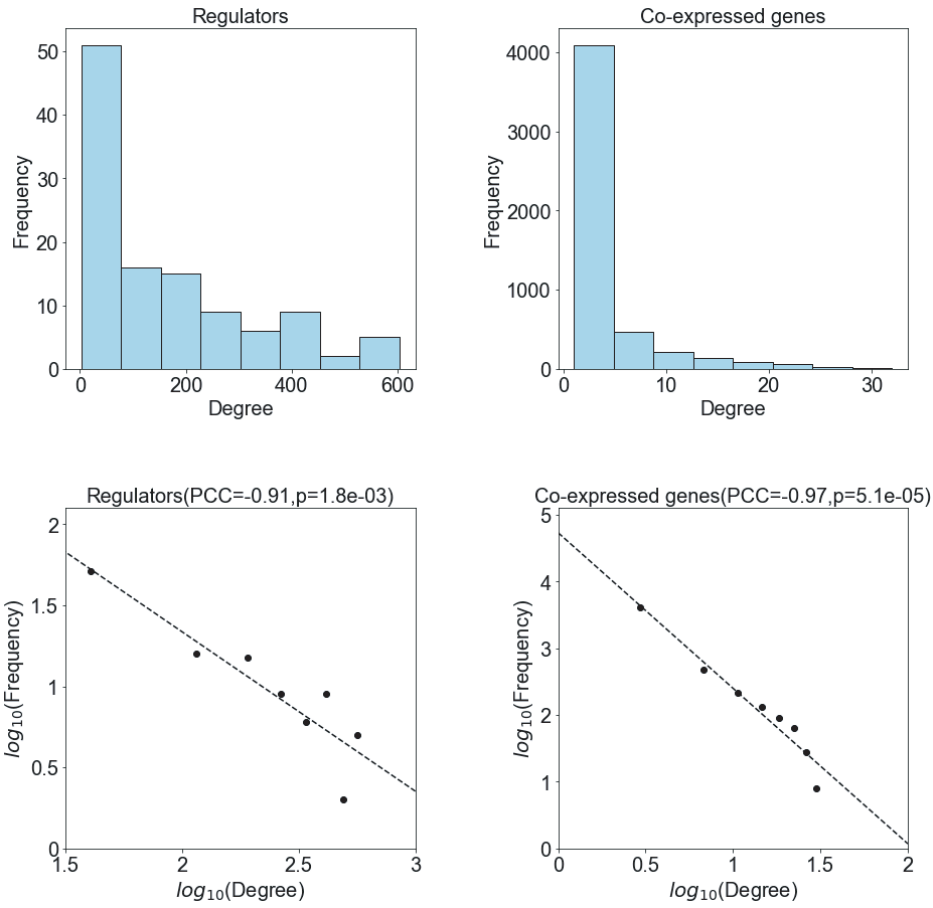

**B**

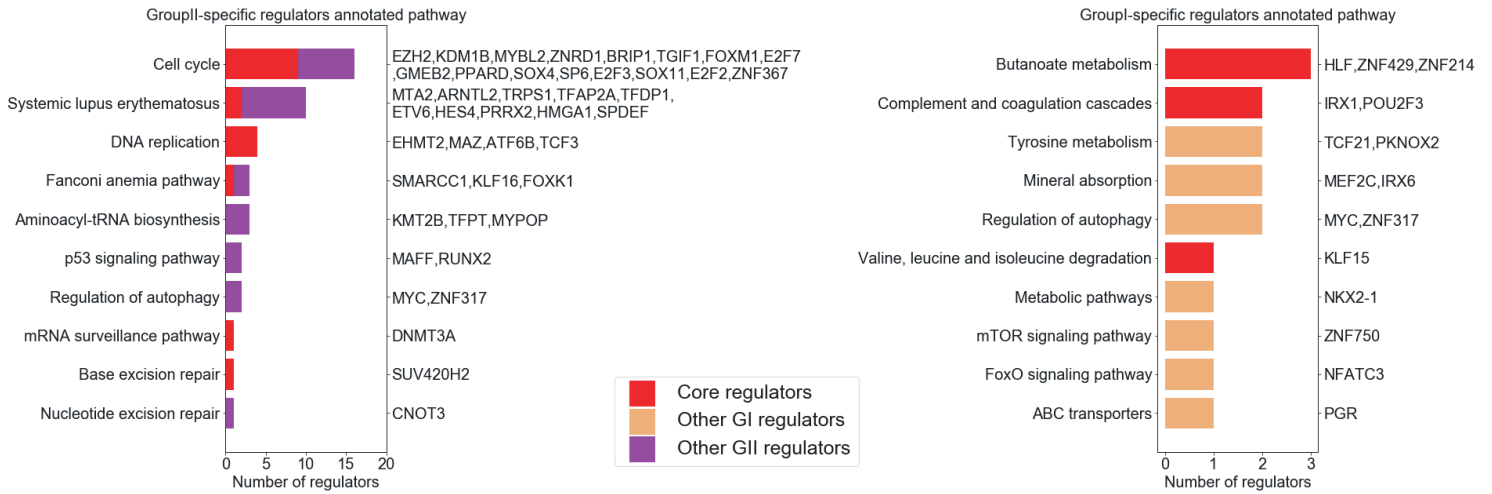

**C**

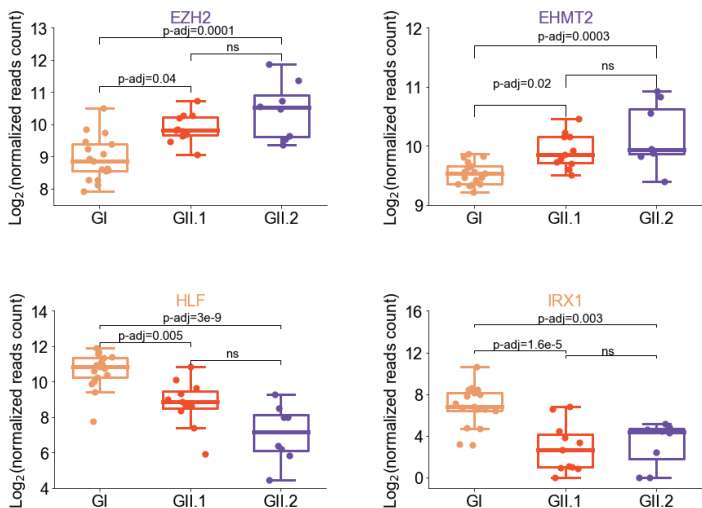

**D**

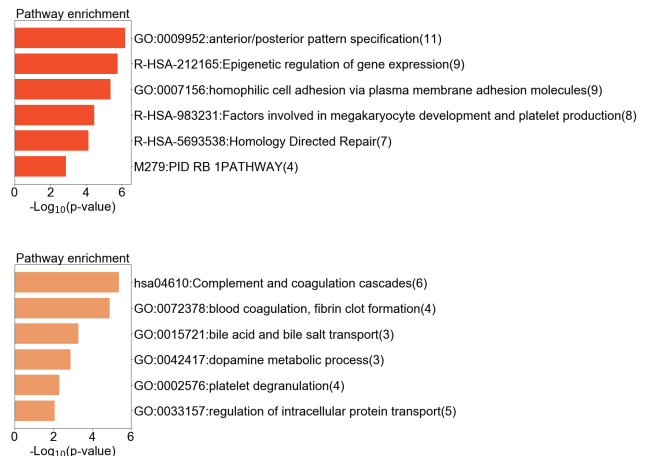



Fig. S10

A

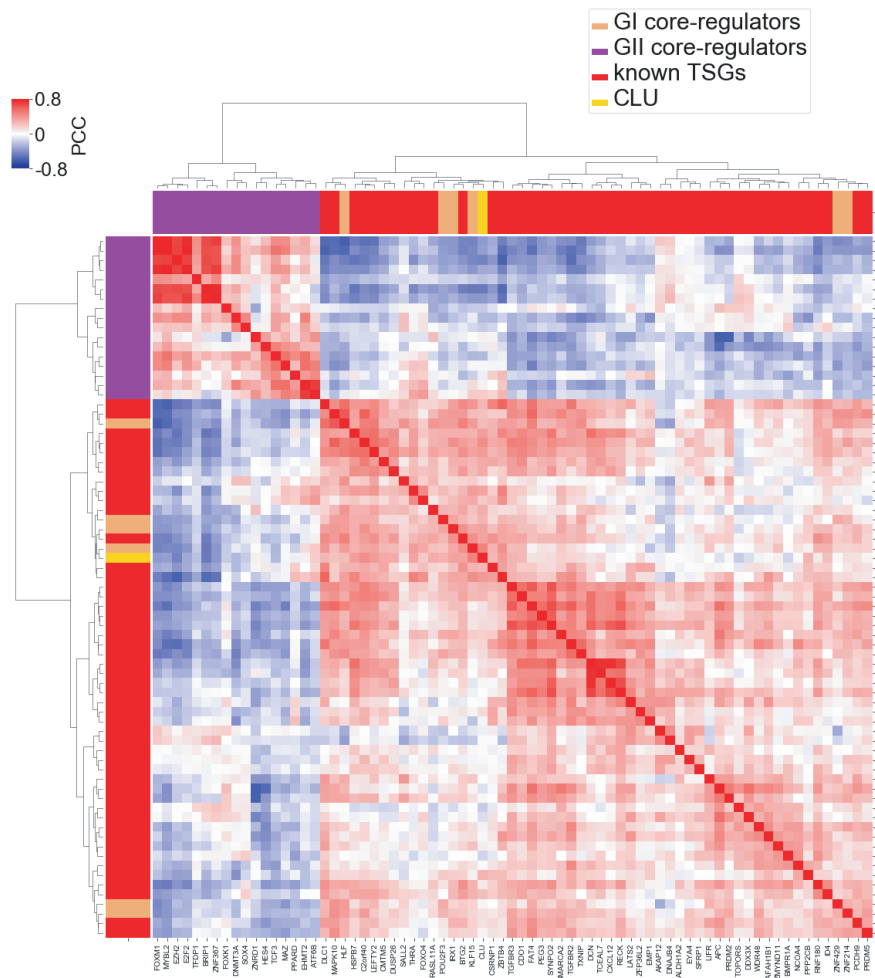

B

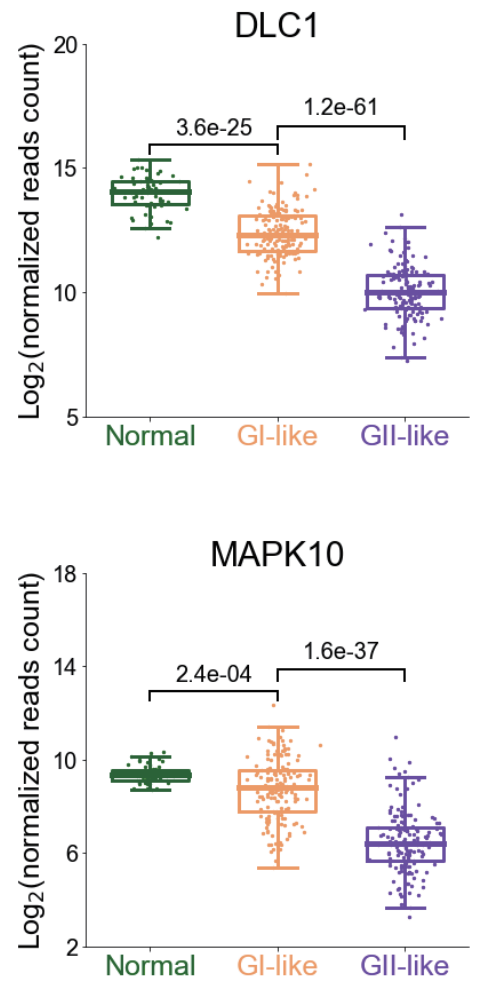

Fig. S11

A

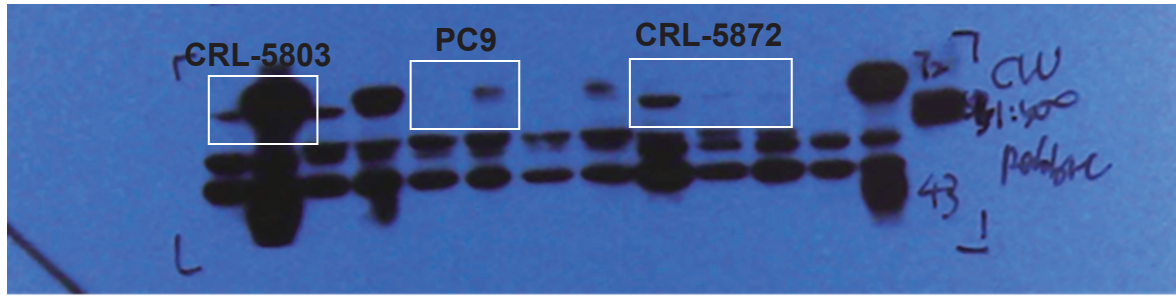

B

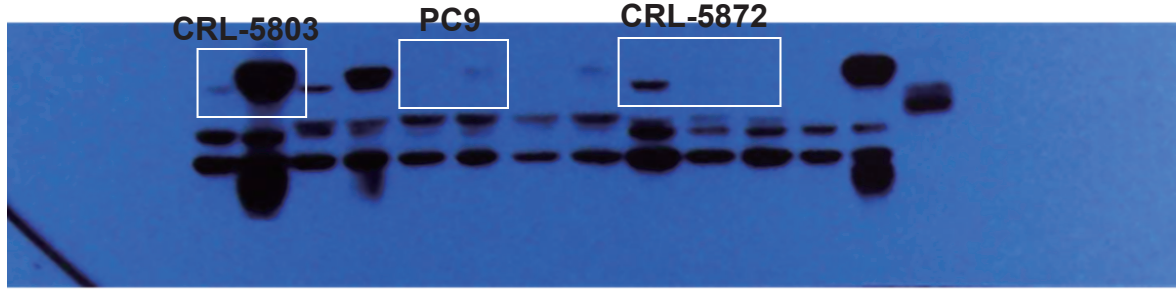

C

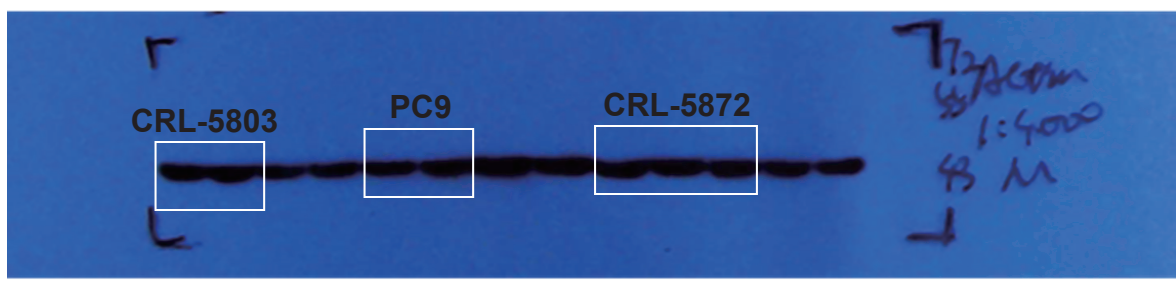

D

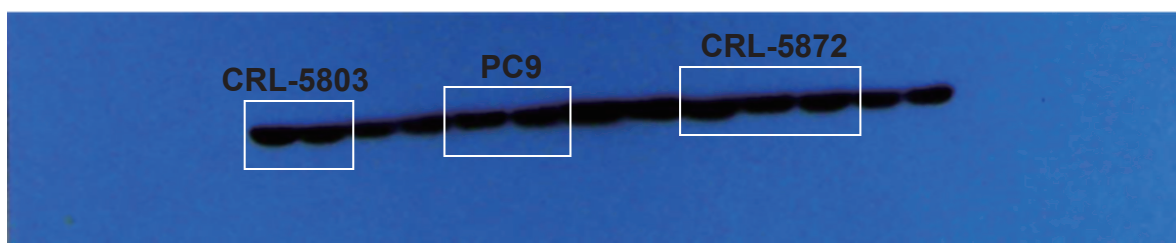

E

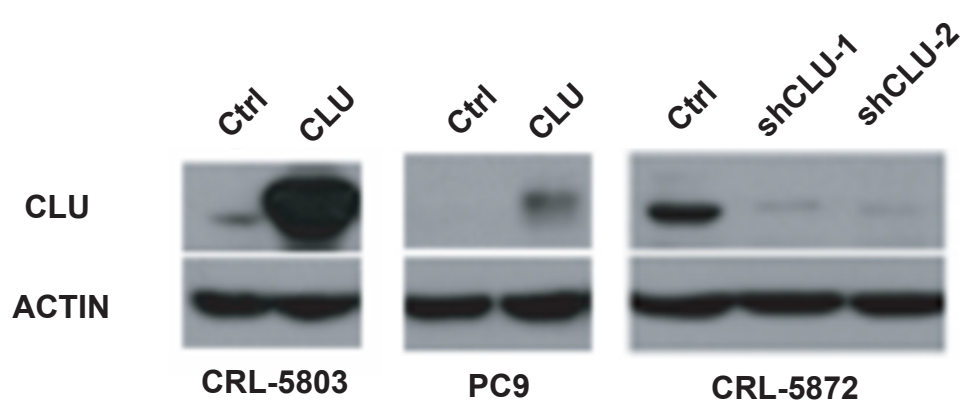

## Supplementary Figure Legends

### Fig.S1: Cohort analysis of H3K27ac profiles in LUAD tumor and normal tissues.

**A)** Saturation analysis showing the number of discrete peaks (left) and the number of new peaks (right) with increasing sample size, indicating our epigenetic profiling adequately captured the LUAD patients' epigenome landscape. **B)** Principle component analysis (PCA) based on H3K27ac signal in tumor and normal tissues, two tissues are well separated, three tumor samples locate between normal tissues and other tumor tissues. **C)** The distribution of the genomic location of tumor-specific sites, normal-specific sites and all sites. **D)** Functional enrichment of tumor or normal-specific sites-associated genes. The numbers represent the number of overlap genes within each pathway. **E)** Unsupervised hierarchical clustering of primary tumor tissues and cell lines based on Pearson's correlation coefficient (PCC) calculated via normalized H3K27ac signal in all peaks covered sites. The H3K27 landscapes between cell lines and primary tumors were quite different. **F)** The number of SEs (left) and TEs (right) identified per sample in normal and tumor tissues. **G)** The percentage of SE domains and H3K27ac signals associated with SEs across all samples. The SEs and normalized H3K27ac signals were identified and calculated using the ROSE algorithm.

### Fig.S2: Identification of differential SEs.

**A)** A bar plot showing the definition and the number of four different types of SEs. Rare SEs contained both normal-specific and tumor-specific sites. **B)** A scatter plot demonstrating the fraction of tumor-specific sites within each SE decreased with the increasing of the number of bins within each SE. We used Fisher's exact test to identify differential SEs based on the relative enrichment of differential H3K27ac sites compared to the background. The color bar indicates significance determined by Fisher's exact test. **C)** Box plots indicating the H3K27ac signal change within three different groups of SEs showed similar tendency between tumor and normal tissues. **D)** Differential sites and non-differential sites distributions between SE and TE regions, Fisher-exact test showed differential sites were highly enriched in super-enhancer regions compared with typical-enhancer.

**Fig.S3: Linking SEs to genes.**

**A)** A track plot demonstrating the difficulty in assigning genes to SEs, two genes *MAX* and *FUT8* are the super-enhancer proximal gene, H3K27ac signal in promoter of *MAX* were not increased with the H3K27ac signal in the SE, the signal in promoter of *FUT8* was positive correlated with the signal in the SE, thus we provide a more reasonable strategy to assign SE target gene. **B)** A model outlining SE target gene assignment. We assign SE target genes based on Pearson's correlation coefficient between SE-score and gene promoter signal (within 500kb). **C)** The correlation between the SE score and promoter H3K27ac signals of the SEs nearby genes (within 500 kb) across all samples, *FUT8* promoter had significant positive correlation with the SE-score, "\*" represented significant signal intensities differences between tumor and normal samples, t-test was used to determine the differences. **D)** A bar plot showing the number of genes mapped per SE, a gene with adjusted p-value less to 0.01 was defined as target gene of the SE. **E)** IHC staining of top-ranked *SIX1*, *SOX4* and *RUNX1* all indicated higher expression of these TFs in tumors. **F)** Track plots of the H3K27ac signal distribution and gene expression in fusion and non-fusion samples across the *SLC34A2* and *ROS1* loci. Number of junction reads from RNA-seq supported *SLC34A2* and *ROS1* gene fusion shown in the left panel.

**Fig.S4: Analysis on hyper-variable peaks.**

**A)** The hyper-variable peaks (HVPs) in normal samples identified based on the global trend of means and variances. The dots are colored according to the significance of the variance test performed by MANorm2, variable peaks with p-value less to 0.01 defined as normal hyper-variable peaks. **B)** A histogram showed the distribution of the expected number of GWAS-SNPs generated from 1,000 random simulations across all peaks, the red line represents the observed number of GWAS-SNPs in hyper-variable peaks identified in tumor samples. **C)** The overlap between tumor hyper-variable peaks(hyper-variable peaks identified in tumor samples), normal hyper-variable peaks(hyper-variable peaks identified in normal samples), peaks upregulated in tumor samples compared to normal samples(previous identified tumor-specific peaks) and peaks upregulated in normal

samples compared to tumor samples (previous identified normal-specific peaks). **D)** Permutation was used to identify significant PCs among hyper-variable peaks in tumor. **E)** The frequent driver gene mutation states of 42 LUAD samples by group. The mutation frequency of *P53* was higher in Group II (58.8%) compared with Group I (36.8%), but the difference was not significant. Three *EML4-ALK* fusion samples were all classified into Group II, one *SLC34A2-ROS1* fusion sample was classified into Group I.

**Fig.S5: Comparison of clustering results based on ChIP-seq and RNA-seq**

**A)** Consensus matrix resulting from consensus clustering analysis based on principle component 1 of tumor hyper-variable peaks.  $k=2$  classified the tumor samples into Group I (GI) and Group II (GII).  $k=3$  classified the tumor samples into Group I (GI), Group II.1 (GII.1) and Group II.2 (GII.2). The strength of the blue color is proportional to the frequency at which samples have been clustered together. **B)** Using Limma-Trend to identify hyper-variable genes ( $p$ -value less to 0.05) in tumor samples RNA-seq data. **C)** Consensus matrix resulting from consensus clustering analysis based on principle component 1 of hyper-variable genes. **D)** Comparison of the clustering results based on ChIP-seq ( $k=2$ ) and RNA-seq ( $k=2$ ) ( $p$ -value of Fisher exact test indicated the consistency of two clustering results). **E)** Survival analysis of the classification result of ChIP-seq ( $k=2$ ) and RNA-seq ( $k=2$ ): Relapse-free survival (top) and Overall survival (bottom),  $p$ -value of log rank test showed in the plot, we have control the sample size in order to make  $p$ -value comparable.

**Fig.S6: Assigning enhancers to genes.**

**A)** A model showing how the distal enhancers (or SEs) were linked to genes via the correlation of H3K27ac signals in enhancer and gene expression within 500kb. **B)** The distribution of non-specific PCC that was used to calculate the  $p$ -value of PCC, non-specific PCCs were calculated via the PCC of randomly select 100,000 genes (not within 500kb or not in the same chromosome) and enhancer pairs. The mean and standard deviation for these non-specific correlations were used to calculate the significance of PCC. **C)** The distribution of the distances from distal enhancers to the TSSs of its linked genes, the number of significant links decrease rapidly with the increased distance. 500kb was



effective to identify significant linked genes. **D)** The distribution of the number of genes mapped per enhancer, most of enhancers were mapped to one gene. **E)** The distribution of enhancers mapped per gene, most of genes were linked to more than one enhancer. **F)** The distribution of the number of skipped genes, about half of links skipped over one or more genes.

**Fig.S7: Epigenetic signatures in GI/GII and the relation to transcriptomic features.**

**A)** Box plots in the top panel indicating the H3K27ac signal changes showed same tendency within three different groups of SEs. Box plots in the bottom panel indicating the gene expression level changes within three different groups of SE-associated genes was highly associated with epigenetic change. **B)** GSEA based on the correlation of PC1 and gene expression level revealed different signatures in GI (right) and GII (left). **C)** IHC staining showed the down regulation of *NKX2-1* and up-regulation of *RUNX2* in GII samples (1821 and 2573) compared with GI samples (2646 and 2589) **D)** Scatter plot showed the IHC score of *NKX2-1* and *RUNX2* in GI and GII samples. *NKX2-1* was significantly down regulated and *RUNX2* was up regulated in GII sample. **E)** LUAD samples were further clustered into three subgroups based on previous hierarchical clustering result. GII was further divided into GII.1 and GII.2. **F)** Scatter plots showing the correlation between PC1 and the ssGSEA-score of two pathway related to stem cell, stemness increasing during the progression in PC1. A gradually up-regulation of activities in stem cell related pathways were observed across GI, GII.1 and GII.2. **G)** Epigenomic(top) and transcriptomic(bottom) differential analysis results between GI, GII.1 and GII.2. Volcano plot showing the differences among the subgroups, GI and GII.1 is quite different on epigenome but similar in transcriptome compared to the differential analysis results between GII.2 and GI. GII.1 is similar to GII.2 in both epigenome and transcriptome.

**Fig.S8: Important biological pathways uncovered by epigenetic signatures.**

**A)** Heatmap of cell cycle pathway genes expression across tumor samples, genes ranked by pearson correlation coefficient between genes expression and PC1 in hyper-variable peaks. Most of cell cycle genes were positive correlated with PC1 and 18 of 124 cell cycle

genes were linked to group-specific distal enhancers. **B)-D)** Important biological pathways identified by GSEA using the ranked PCC between gene-expression and PC1. **B)** Our epigenetic classification model can be verified by another cohort analysis based on LUAD transcriptome. **C)** Important pathways enriched in GII, embryonic stem cell core indicated GII was stem cell like tumor, cell cycle targets of *TP53* and *TP73* down indicated cell cycle genes up-regulation might related to *TP53* and *TP73*, *EZH2* targets indicated alterations in GII might relate to epigenetic regulators. **D)** Important pathway enriched in GI, suggested GI maintained some normal like function and immune-cell related signaling pathways.

**Fig.S9: Core regulators identification and the functional signature.**

**A)** The distribution of degree of regulators (left 2 panels) and co-expressed genes (right 2 panels) were in line with a power law form. **B)** The functional signatures of GI-specific regulators (right) and GII-specific regulators (right), core regulators (red) were annotated to top ranked biological pathways. Regulators were annotated by the most significant pathway enriched based on its co-expressed genes. Pathways were ranked by the number of regulators annotated to this pathway. **C)** Expression changes of four group-specific core-regulators across GI, GII.1 and GII.2. Two GII-specific core regulators and two GI-specific core regulators identified as GII.1 up-regulated genes (n=62) and down-regulated genes (n=61) compared to GI were showed in the up panel and bottom panel respectively, adjusted p-value calculated via DESeq2. These Group-specific core-regulators gradually upregulated or downregulated across GI, GII.1 and GII.2. **D)** Function enrichment of GII.1 up-regulated genes and down-regulated genes, epigenetic regulation of gene expression was firstly altered between GI and GII.1.

**Fig.S10: The relationship between core regulators and TSGs.**

**A)** Pearson correlation matrix for core-regulators and TSGs of TCGA-LUAD cohort. *CLU* was positive correlated with GI-specific core-regulators but negative correlated with GII-specific core-regulators. **B)** Gene expression level of *MAPK10* and *DLC1* in normal, GI-like and GII-like samples in TCGA-LUAD cohort, p-value of t-test was showed in the plot.

**Fig.S11: The full uncropped Western blot picture and related separate picture in Figure 5.**

**A-B)** Uncropped Western blot detection of *CLU* in CRL-5803, PC9 and CRL-5872 cells with ectopic expression, knockdown or without treatment under long(A) and short(B) time exposure. **C-D)** Uncropped Western blot detection of *Actin* in CRL-5803, PC9 and CRL-5872 cells with ectopic expression, knockdown or without treatment under long(C) and short(D) time exposure. **E)** Related Western blot detection results of *CLU* and *Actin* in Figure 5.
